# Supplementary material for: A covalent chemical probe for Chikungunya nsP2 cysteine protease with antialphaviral activity and proteome-wide selectivity
Source: Sci Rep. 2025 Mar 1;15:7264. doi: 10.1038/s41598-025-91673-x (PMC11873239; doi:10.1038/s41598-025-91673-x)
Supplement: Supplementary file 2 — Supplementary Information 2. [file 41598_2025_91673_MOESM2_ESM.xlsx]

## Sheet: Key
nsP2 Peptides tab. All peptides and their isoforms mapping to the nsP2 protein. The list is sorted by abundance (#PSMs, column I) except for the modified peptide listed at the top.
Column	Description
Position in Master Proteins	Position of the peptide in the respective Nsp protein sequence. Peptide isoforms containing a high-confidence modification are bolded and highlighted in blue.
Sequence	Sequence of the peptide
Modifications	Modifications related to sample preparation (carbamidomethyl C, and methyl oxidation)
Modifications in Master Proteins	If modifications were detected, this column would indicate the the residue and localization probability.
Mass shift	Mass shift in Da of the modification.
# PSMs	The term PSM stands for a peptide spectrum match. A PSM links a particular spectrum to a specific peptide sequence. A PSM is different from a peptide in that many PSMs might be linked to the same peptide. One peptide links to one or more PSMs. This can be used as an estimate of abundance.
# Missed cleavages	#tryptic cleavage sites that were missed during tryptic digestion
Scaled Abundances	Scaled LFQ intensities, used to compare relative abundances of each peptide across samples, expressed as a percentage.
Normalized LFQ intensities	LFQ intensities (unimputed), before scaling.
Theo MH+, delta m/z, RT, PEP, Xcorr	Metrics used by the software (PD3.1) to identify the peptide, and quality of PSMs used for its identification

## Sheet: nsP2 peptides
						Scaled Abundances				Normalized LFQ Abundances
Positions in Master Proteins	Annotated Sequence	Modifications	Mass shift	# PSMs	# Missed Cleavages	Control_R1	Control_R2	Probe_R1	Probe_R2	Control_R1	Control_R2	Probe_R1	Probe_R2	Theo. MH+ [Da]	Deltam/z [Da]: Sequest HT	RT [min]: Sequest HT	PEP: Sequest HT	XCorr: Sequest HT
nsP2 [32-38]	[K].ANVCWAK.[S]	1xPC1326_Byonic [C4(100)]	350.094	12	0	0.075	0.05	46.475	53.4	92919.6	68210.2	5.2849e+07	6.07158e+07	1141.48	-0.00045	73.1305	7.52864e-05	1.67
nsP2 [165-180]	[R].LPHSLVAEHRPVKGER.[M]			1115	2	20.25	28.875	25.575	25.3	1.74664e+08	2.49064e+08	2.20688e+08	2.18348e+08	1825.02	-0.00048	31.3524	1.41298e-15	4.1
nsP2 [188-207]	[K].INGHHVLLVSGYNLALPTKR.[V]			818	1	25.55	25.275	23.4	25.75	1.08025e+09	1.06831e+09	9.89355e+08	1.08887e+09	2202.25	0.00082	46.5993	6.30512e-16	6.25
nsP2 [272-282]	[R].LLKPGGSLLIR.[A]			597	1	28.05	24.575	24.075	23.3	1.38277e+09	1.21051e+09	1.18627e+09	1.14796e+09	1166.76	-0.00037	52.7591	2.43352e-09	2.82
nsP2 [236-248]	[R].YDLVVINIHTPFR.[I]			520	0	23.35	27.2	23.85	25.6	4.32973e+08	5.04803e+08	4.4253e+08	4.74948e+08	1586.87	0.0003	67.8961	6.30512e-16	4.2
nsP2 [82-113]	[R].MYGVDLDSGLFSKPLVSVYYADNHWDNRPGGK.[M]	1xOxidation [M1]		421	2	21.325	26.275	34	18.425	5.93132e+07	7.30614e+07	9.45822e+07	5.12349e+07	3616.72	0.00056	73.7165	6.30512e-16	4.54
nsP2 [39-50]	[K].SLVPILETAGIK.[L]			353	0	24.7	24.775	25.875	24.675	2.59854e+09	2.60678e+09	2.72417e+09	2.59606e+09	1240.75	-0.00013	79.6318	2.4992e-09	1.74
nsP2 [82-113]	[R].MYGVDLDSGLFSKPLVSVYYADNHWDNRPGGK.[M]			331	2	30.35	30.825	25.9	12.925	1.61699e+08	1.64176e+08	1.38017e+08	6.88313e+07	3600.72	-0.00051	76.536	6.30512e-16	5.27
nsP2 [307-331]	[R].ALKPPCVTSNTEMFFLFSNFDNGRR.[N]	1xCarbamidomethyl [C6]		325	2	25.925	27.675	23.925	22.475	2.09798e+08	2.23856e+08	1.93553e+08	1.81733e+08	2948.42	0.00045	75.2095	4.065e-13	5.18
nsP2 [55-67]	[R].QWSQIIQAFKEDK.[A]			316	1	21.825	20.875	19.9	37.4	5.00894e+08	4.7918e+08	4.5638e+08	8.58131e+08	1620.84	0.00026	56.3119	1.64665e-13	4.2
nsP2 [114-127]	[K].MFGFNPEAASILER.[K]	1xOxidation [M1]		285	0	29.075	24.2	25.6	21.125	1.3114e+08	1.09149e+08	1.15501e+08	9.52759e+07	1597.77	-0.00025	69.0005	6.30512e-16	3.33
nsP2 [148-163]	[R].RIEDFNPTTNIIPANR.[R]			280	1	25.675	24.475	24.1	25.75	6.91932e+08	6.59949e+08	6.49786e+08	6.93806e+08	1870.98	6e-05	53.0606	8.84848e-16	4.33
nsP2 [307-330]	[R].ALKPPCVTSNTEMFFLFSNFDNGR.[R]	1xCarbamidomethyl [C6]		267	1	14.9	29.95	20.4	34.775	4.78656e+07	9.62327e+07	6.55861e+07	1.11757e+08	2792.32	0.00081	83.2423	6.30512e-16	4.44
nsP2 [218-235]	[R].GADYTYNLELGLPATLGR.[Y]			263	0	22.9	25.2	25.6	26.3	1.27756e+09	1.40521e+09	1.42758e+09	1.46701e+09	1923.98	0.00047	78.5456	6.30512e-16	4.34
nsP2 [149-163]	[R].IEDFNPTTNIIPANR.[R]			244	0	25.075	24.4	26.8	23.725	4.79155e+08	4.6648e+08	5.12323e+08	4.5357e+08	1714.88	-0.00052	58.3343	6.30512e-16	2.76
nsP2 [114-127]	[K].MFGFNPEAASILER.[K]			180	0	26.175	27.575	24.65	21.6	4.70014e+08	4.95066e+08	4.42671e+08	3.87692e+08	1581.77	0.00012	79.6438	1.20511e-14	3.39
nsP2 [164-177]	[R].RLPHSLVAEHRPVK.[G]			161	2	14.7	23.225	28.975	33.1	2.26019e+07	3.57052e+07	4.45669e+07	5.08991e+07	1638.96	-0.00052	26.7741	6.30512e-16	5.26
nsP2 [249-261]	[R].IHHYQQCVDHAMK.[L]	1xCarbamidomethyl [C7];1xOxidation [M12]		151	0	38.55	19.35	26.575	15.525	8.52452e+07	4.27855e+07	5.87719e+07	3.43559e+07	1682.75	0.00047	16.8537	1.03034e-09	2.16
nsP2 [148-164]	[R].RIEDFNPTTNIIPANRR.[L]			142	2	20.075	31.575	24	24.325	1.62109e+08	2.54813e+08	1.93735e+08	1.96371e+08	2027.08	-0.001	41.8844	6.30512e-16	3.75
nsP2 [307-330]	[R].ALKPPCVTSNTEMFFLFSNFDNGR.[R]	1xCarbamidomethyl [C6];1xOxidation [M13]		139	1	15.425	29.825	18.775	35.95	1.14918e+07	2.22229e+07	1.39874e+07	2.67879e+07	2808.31	-2e-05	74.7067	6.30512e-16	3.62
nsP2 [181-187]	[R].MEWLVNK.[I]	1xOxidation [M1]		131	0	30.625	26.65	23.625	19.1	1.46007e+08	1.27033e+08	1.1258e+08	9.10512e+07	935.466	-0.00071	42.1426	7.54841e-05	2.15
nsP2 [262-271]	[K].LQMLGGDSLR.[L]	1xOxidation [M3]		119	0	33.35	25.025	25.4	16.2	1.40324e+08	105302707	1.06883e+08	6.81777e+07	1105.57	-8e-05	30.8521	2.61244e-06	1.48
nsP2 [95-113]	[K].PLVSVYYADNHWDNRPGGK.[M]			115	1	19.375	37.8	22.575	20.25	5.99993e+07	1.16997e+08	6.99079e+07	6.26507e+07	2188.06	-0.00035	45.3096	6.30512e-16	4.1
nsP2 [332-352]	[R].NFTTHVMNNQLNAAFVGQVTR.[A]			112	0	30.15	26.425	21.275	22.175	9.9948e+07	8.76003e+07	7.05567e+07	7.35116e+07	2362.17	0.00174	58.0218	6.30512e-16	5.02
nsP2 [307-331]	[R].ALKPPCVTSNTEMFFLFSNFDNGRR.[N]	1xCarbamidomethyl [C6];1xOxidation [M13]		111	2	30.25	21	21.325	27.425	5.4518e+07	3.78448e+07	3.84138e+07	4.944e+07	2964.41	-0.00079	67.5255	2.22771e-09	4.87
nsP2 [141-147]	[K].QICVTTR.[R]	1xCarbamidomethyl [C3]		111	0	21.625	23.175	26.725	28.5	2.1723e+09	2.32831e+09	2.68472e+09	2.8624e+09	877.456	-0.00027	22.1524	0.000531706	1.57
nsP2 [188-206]	[K].INGHHVLLVSGYNLALPTK.[R]			111	0	18.45	22.25	30.675	28.625	1.43579e+08	1.73237e+08	2.38769e+08	2.228e+08	2046.15	0.00026	57.0825	6.30512e-16	5.27
nsP2 [68-81]	[K].AYSPEVALNEICTR.[M]	1xCarbamidomethyl [C12]		109	0	26.225	24.475	24.875	24.4	1.7081e+09	1.594e+09	1.61983e+09	1.58884e+09	1622.78	0.00038	54.8616	1.62628e-14	3.18
nsP2 [128-133]	[R].KYPFTK.[G]			108	1	25.15	23.95	25.6	25.3	9.95188e+08	9.48026e+08	1.01311e+09	1.00147e+09	783.44	1e-05	19.3947	0.000115836	1.42
nsP2 [332-352]	[R].NFTTHVMNNQLNAAFVGQVTR.[A]	1xOxidation [M7]		106	0	35.35	25.45	21.55	17.65	3.59355e+07	2.5886e+07	2.19097e+07	1.79578e+07	2378.17	0.00054	50.5883	6.30512e-16	4.61
nsP2 [249-261]	[R].IHHYQQCVDHAMK.[L]	1xCarbamidomethyl [C7]		103	0	23.45	34.75	34.5	7.3	4.70643e+07	6.97023e+07	6.92235e+07	1.46255e+07	1666.76	-5e-05	15.9956	6.30512e-16	3.7
nsP2 [294-300]	[R].VICVLGR.[K]	1xCarbamidomethyl [C3]		92	0	26.3	25.075	24.325	24.3	1.98543e+09	1.89354e+09	1.83697e+09	1.83392e+09	816.476	1e-05	46.3273	0.000165499	1.48
nsP2 [165-177]	[R].LPHSLVAEHRPVK.[G]			81	1	16.65	32.75	23.85	26.75	6.73211e+07	1.32408e+08	9.64123e+07	1.08125e+08	1482.85	-0.00035	21.3258	1.87362e-15	3.95
nsP2 [181-187]	[R].MEWLVNK.[I]			73	0	30.475	21.7	28.25	19.575	5.53881e+08	3.94283e+08	5.13213e+08	3.55655e+08	919.471	-8e-05	49.0088	5.01805e-05	1.15
nsP2 [208-217]	[R].VTWVAPLGVR.[G]			72	0	27.35	22.7	25.55	24.4	1.93047e+09	1.60211e+09	1.80234e+09	1.72143e+09	1097.65	3e-05	57.5301	2.01755e-06	1.81
nsP2 [82-94]	[R].MYGVDLDSGLFSK.[P]	1xOxidation [M1]		65	0	24.3	24.575	28.15	22.95	1.34992e+07	1.36553e+07	1.56458e+07	1.27568e+07	1447.68	3e-05	68.1663	6.30512e-16	3.36
nsP2 [181-207]	[R].MEWLVNKINGHHVLLVSGYNLALPTKR.[V]	1xOxidation [M1]		53	2	15.35	23.125	17.45	44.075	373472	562569	424613	1.07187e+06	3118.7	-0.0002	72.4979	6.95076e-09	2.33
nsP2 [39-54]	[K].SLVPILETAGIKLNDR.[Q]			49	1	37.1	22.225	19.25	21.425	8.41108e+07	5.03949e+07	4.36072e+07	4.85481e+07	1739.01	0.00013	66.9819	1.16327e-13	3.72
nsP2 [55-64]	[R].QWSQIIQAFK.[E]			44	0	22.45	25.475	25.425	26.65	1.59091e+08	1.80465e+08	1.80081e+08	1.88871e+08	1248.67	-0.00035	64.0202	2.62047e-08	3.12
nsP2 [207-217]	[K].RVTWVAPLGVR.[G]			40	1	28.725	27.975	21.55	21.775	1.29828e+08	1.26442e+08	9.744e+07	9.84405e+07	1253.75	-0.00156	43.9481	1.9782e-09	2.29
nsP2 [262-271]	[K].LQMLGGDSLR.[L]			38	0	31.6	24.225	27.5	16.675	5.29269e+08	4.05794e+08	4.6054e+08	2.79097e+08	1089.57	0.0005	43.2628	2.37972e-07	2.15
nsP2 [149-164]	[R].IEDFNPTTNIIPANRR.[L]			35	1	25.325	25.1	24.225	25.35	8.75502e+08	8.67338e+08	8.37445e+08	8.76522e+08	1870.98	-0.00046	48.5066	4.0954e-11	2.97
nsP2 [331-352]	[R].RNFTTHVMNNQLNAAFVGQVTR.[A]	1xOxidation [M8]		28	1	24.1	35.625	15.6	24.675	1.18049e+06	1.74532e+06	764147	1.2092e+06	2534.27	-8e-05	52.156	4.36398e-07	1.82
nsP2 [283-289]	[R].AYGYADR.[T]			28	0	24.4	24.475	25.325	25.825	1.30256e+09	1.30642e+09	1.35227e+09	1.37917e+09	815.368	5e-05	15.2678	0.000159805	1.29
nsP2 [275-282]	[K].PGGSLLIR.[A]			25	0	25.925	25.925	24.15	23.975	1.31917e+07	1.31942e+07	1.22937e+07	1.22032e+07	812.499	-0.0003	39.8418	9.41512e-08	2.61
nsP2 [32-38]	[K].ANVCWAK.[S]	1xCarbamidomethyl [C4]		24	0	26.125	25.525	22.025	26.325	1.42067e+09	1.38823e+09	1.19852e+09	1.43208e+09	848.408	-0.00026	20.3431	0.00193885	1.94
nsP2 [134-140]	[K].GKWNINK.[Q]			22	1	20.1	41.55	22.7	15.675	2.04172e+08	422072079	2.30604e+08	1.59245e+08	859.478	0.00022	9.1872	0.000299617	2.47
nsP2 [55-81]	[R].QWSQIIQAFKEDKAYSPEVALNEICTR.[M]	1xCarbamidomethyl [C25]		20	2	35.725	27.9	16.35	20.025	2.18079e+06	1.70293e+06	998397	1.22174e+06	3224.6	-0.00024	76.2619	1.07916e-08	3.42
nsP2 [51-67]	[K].LNDRQWSQIIQAFKEDK.[A]			20	2	39.475	22.85	19.7	17.975	2.20047e+06	1.27415e+06	1.09782e+06	1.00189e+06	2119.09	0.00047	61.6868	6.74487e-08	3.07
nsP2 [331-352]	[R].RNFTTHVMNNQLNAAFVGQVTR.[A]			17	1	34.65	27.4	20.725	17.225	8.46009e+06	6.68756e+06	5.05933e+06	4.20304e+06	2518.27	5e-05	53.2283	6.30512e-16	6.01
nsP2 [65-81]	[K].EDKAYSPEVALNEICTR.[M]	1xCarbamidomethyl [C15]		14	1	37.75	22.625	20.025	19.575	2.47994e+06	1.48695e+06	1.31602e+06	1.28565e+06	1994.95	-0.00016	50.1327	2.04692e-10	4.02
nsP2 [181-207]	[R].MEWLVNKINGHHVLLVSGYNLALPTKR.[V]			13	2	39	14.875	21.575	24.525	1.47384e+06	561975	815290	926876	3102.7	0.00161	74.0314	0.00334068	1.66
nsP2 [294-301]	[R].VICVLGRK.[F]	1xCarbamidomethyl [C3]		11	1	29.4	23.65	22.325	24.65	2.46964e+07	19865330	1.87595e+07	2.0706e+07	944.571	0.00035	18.145	4.64688e-05	1.47
nsP2 [165-174]	[R].LPHSLVAEHR.[P]			8	0	22.375	38.1	24.4	15.15	6.33091e+06	1.0782e+07	6.90743e+06	4.28808e+06	1158.64	-0.00075	16.6765	1.48444e-06	2.5
nsP2 [82-94]	[R].MYGVDLDSGLFSK.[P]			8	0	23.45	26.9	27.65	22	4.22523e+07	48479460	4.98134e+07	3.96424e+07	1431.68	0	68.8686	9.50671e-11	3.17
nsP2 [114-128]	[K].MFGFNPEAASILERK.[Y]	1xOxidation [M1]		7	1	40.975	17.575	29.85	11.6	556040	238439	405086	157536	1725.86	-0.00017	59.9463	1.26684e-05	1.7
nsP2 [114-128]	[K].MFGFNPEAASILERK.[Y]			5	1	36.875	22.1	24.85	16.175	3.30748e+06	1.98288e+06	2.22938e+06	1.45222e+06	1709.87	0.00044	62.9832	1.8608e-10	2.85
nsP2 [290-300]	[R].TSERVICVLGR.[K]	1xCarbamidomethyl [C7]		4	1	39.75	24.45	17.275	18.525	1.43861e+06	884352	625304	669850	1289.7	2e-05	31.0502	9.41677e-11	2.53
nsP2 [134-147]	[K].GKWNINKQICVTTR.[R]	1xCarbamidomethyl [C10]		4	2	42.375	24	19	14.625	811433	459916	363837	280170	1717.92	-6e-05	33.123	0.000139768	1.85
nsP2 [272-289]	[R].LLKPGGSLLIRAYGYADR.[T]			4	2	17.7	43.1	21.575	17.65	294126	716622	358527	293326	1963.11	-0.00153	55.262	3.20429e-08	2.42
nsP2 [359-371]	[K].GGYGLNDIFEAQK.[I]			4	0	24.725	25.575	24.125	25.575	964383	997471	941577	997879	1411.69	1e-05	58.5965	9.43661e-11	1.51
nsP2 [141-148]	[K].QICVTTRR.[I]	1xCarbamidomethyl [C3]		3	1	48.875	0.175	17.625	33.325	8.8904e+06	30074.3	3.20613e+06	6.06398e+06	1033.56	0.00098	9.4476	0.000430268	1.66
nsP2 [283-300]	[R].AYGYADRTSERVICVLGR.[K]	1xCarbamidomethyl [C14]		2	2	0	100	0	0		482566			2086.05	-0.00271	44.0505	0.000156871	1.86
nsP2 [262-282]	[K].LQMLGGDSLRLLKPGGSLLIR.[A]			2	2	35.65	21.975	24.375	18	489995	302078	334844	247403	2237.32	3e-05	72.7134	0.000352664	1.81
nsP2 [290-301]	[R].TSERVICVLGRK.[F]	1xCarbamidomethyl [C7]		1	2	40.175	24.05	21.7	14.075	292897	175306	158305	102679	1417.79	-0.00039	23.0031	2.57202e-05	1.42
nsP2 [283-293]	[R].AYGYADRTSER.[V]			1	1	38.975	23.925	17.825	19.25	4.30286e+06	2641972	1.96826e+06	2.1243e+06	1288.59	0.00012	12.2613	3.34247e-05	1.89
